# Supplementary material for: Solvent-dependent fluorescent-colorimetric probe for dual monitoring of Al3+ and Cu2+ in aqueous solution: an application to bio-imaging
Source: Royal Society of Chemistry journal article supplement (doi:10.1039/c6dt01795a), 2016-01-01
Supplement: c6dt01795a1.pdf [file c6dt01795a1.pdf]

## Supplementary Informations

# Solvent-dependent fluorescent-colorimetric probe for dual monitoring of Al<sup>3+</sup> and Cu<sup>2+</sup> in aqueous solution: An application to bio-imaging

Anupam Ghorai,<sup>a</sup> Jahangir Mondal,<sup>a</sup> Shubhamoy Chowdhury<sup>b</sup> and Goutam K. Patra<sup>a\*</sup>

<sup>a</sup>Department of Chemistry, Guru Ghasidas Vishwavidyalaya, Bilaspur (C.G), India

<sup>b</sup>Department of Chemistry, Tripura University, Suryamaninagar, Tripura 799 022, India

### Table of Contents

| Sl.No. | Content                                                                                                                   | Figure No. |
|--------|---------------------------------------------------------------------------------------------------------------------------|------------|
| 1.     | <sup>1</sup> H NMR spectra of <b>L</b>                                                                                    | <b>S1</b>  |
| 2.     | <sup>13</sup> C NMR of <b>L</b>                                                                                           | <b>S2</b>  |
| 3.     | IR spectra of <b>L</b>                                                                                                    | <b>S3</b>  |
| 4.     | Mass spectra of <b>L</b>                                                                                                  | <b>S4</b>  |
| 5.     | <sup>1</sup> H NMR of control compound <b>L</b> <sub>1</sub>                                                              | <b>S5</b>  |
| 6.     | <sup>13</sup> C NMR of <b>L</b> <sub>1</sub>                                                                              | <b>S6</b>  |
| 7.     | IR spectra of <b>L</b> <sub>1</sub>                                                                                       | <b>S7</b>  |
| 8.     | Mass spectra of <b>L</b> <sub>1</sub>                                                                                     | <b>S8</b>  |
| 9.     | Change of Fluorescence intensity on increasing amounts of Al <sup>3+</sup> at pH=7.4                                      | <b>S9</b>  |
| 10.    | Change of Fluorescence intensity on increasing amounts of Cu <sup>2+</sup> at pH=7.4                                      | <b>S10</b> |
| 11.    | ESI-MS of <b>L</b> at different pH                                                                                        | <b>S11</b> |
| 12.    | The MO diagram of <b>L</b> (left), <b>1</b> (middle) and <b>2</b> (right) are showing energy level.                       | <b>S12</b> |
| 13.    | Hill plot for Al <sup>3+</sup>                                                                                            | <b>S13</b> |
| 14.    | Detection limit for Al <sup>3+</sup>                                                                                      | <b>S14</b> |
| 15.    | Hill plot for Cu <sup>2+</sup>                                                                                            | <b>S15</b> |
| 16.    | Detection limit for Cu <sup>2+</sup>                                                                                      | <b>S16</b> |
| 17.    | Absorbance spectra of <b>L</b> (10 μM) before and after addition different metal ions in acetonitrile–water (2 : 1, v/v). | <b>S17</b> |
| 18.    | Job's plot for (a) Al <sup>3+</sup> and (b) Cu <sup>2+</sup>                                                              | <b>S18</b> |
| 19.    | Mass spectra of <b>L</b> -Al <sup>3+</sup> complex, <b>1</b> and <b>L</b> -Cu <sup>2+</sup> complex, <b>2</b>             | <b>S19</b> |
| 20.    | <sup>1</sup> H NMR titration of <b>1</b>                                                                                  | <b>S20</b> |
| 21.    | Sem images of <b>L</b> , <b>L</b> +Al <sup>3+</sup> complex, <b>1</b> and <b>L</b> +Cu <sup>2+</sup> complex, <b>2</b>    | <b>S21</b> |
| 22.    | Change of absorbance spectra of <b>L</b> <sub>1</sub> on addition of Al <sup>3+</sup> and Cu <sup>2+</sup> .              | <b>S22</b> |

|     |                                                                                                                                                |                 |
|-----|------------------------------------------------------------------------------------------------------------------------------------------------|-----------------|
| 23. | The calculated electronic transition parameters by the TD-DFT method compared with experimental results for <b>L</b> , <b>1</b> and <b>2</b> . | <b>Table S1</b> |
|-----|------------------------------------------------------------------------------------------------------------------------------------------------|-----------------|

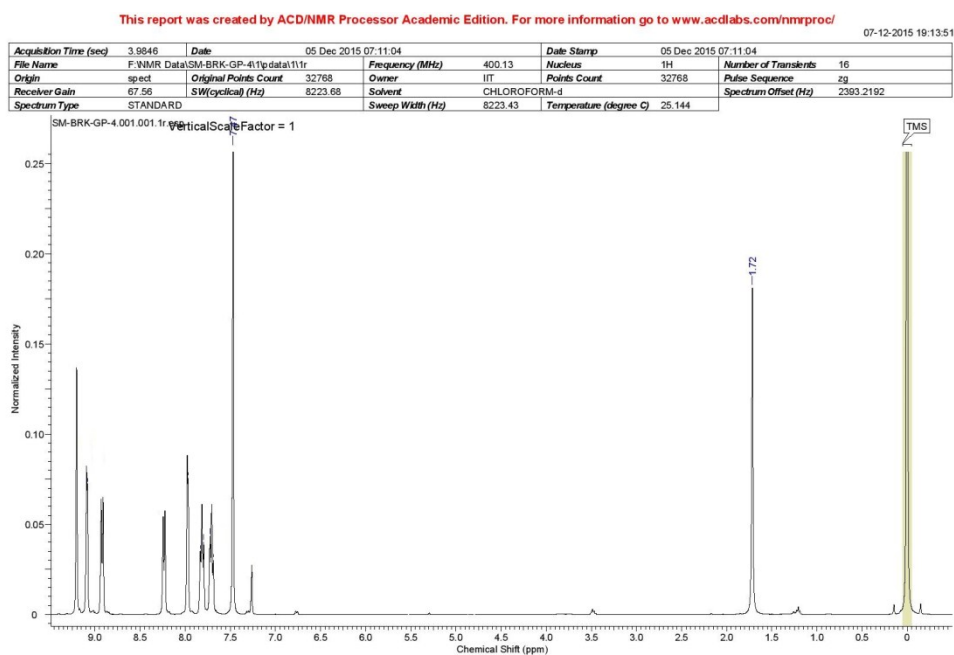

**Fig. S1.** <sup>1</sup>H NMR Spectra of **L** in CDCl<sub>3</sub>.

|                        |                      |                      |                                     |                       |                      |
|------------------------|----------------------|----------------------|-------------------------------------|-----------------------|----------------------|
| Acquisition Time (sec) | 1.3631               | Comment              | 5 mm BBI 1H-D-BB Z-GRD Z8202/0383   | Date                  | 05 Dec 2015 14:54:00 |
| Date Stamp             | 05 Dec 2015 14:54:00 | File Name            | F:\NMR Data\SM-BRK-GP-4\2\data\111r | Frequency (MHz)       | 100.61               |
| Nucleus                | <sup>13</sup> C      | Number of Transients | 8096                                | Original Points Count | 32768                |
| Points Count           | 32768                | Pulse Sequence       | zgpg30                              | Receiver Gain         | 191.83               |
| Solvent                | CHLOROFORM-d         | Spectrum Offset (Hz) | 10061.0059                          | Spectrum Type         | STANDARD             |
| Temperature (degree C) | 25.118               |                      |                                     | Sweep Width (Hz)      | 24037.73             |

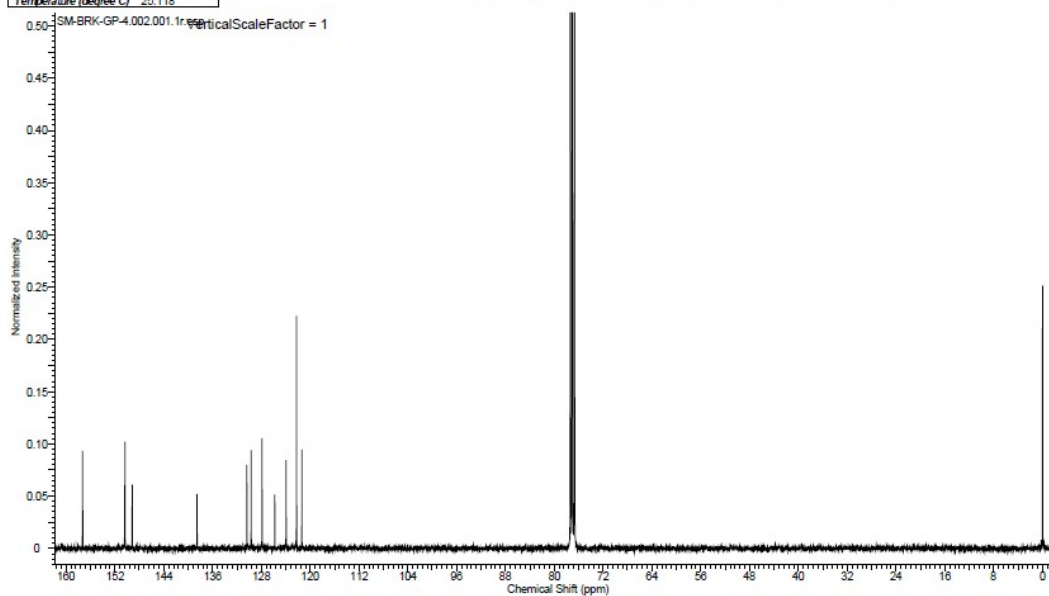

**Fig. S2.** <sup>13</sup>C NMR Spectra of **L** in CDCl<sub>3</sub>.

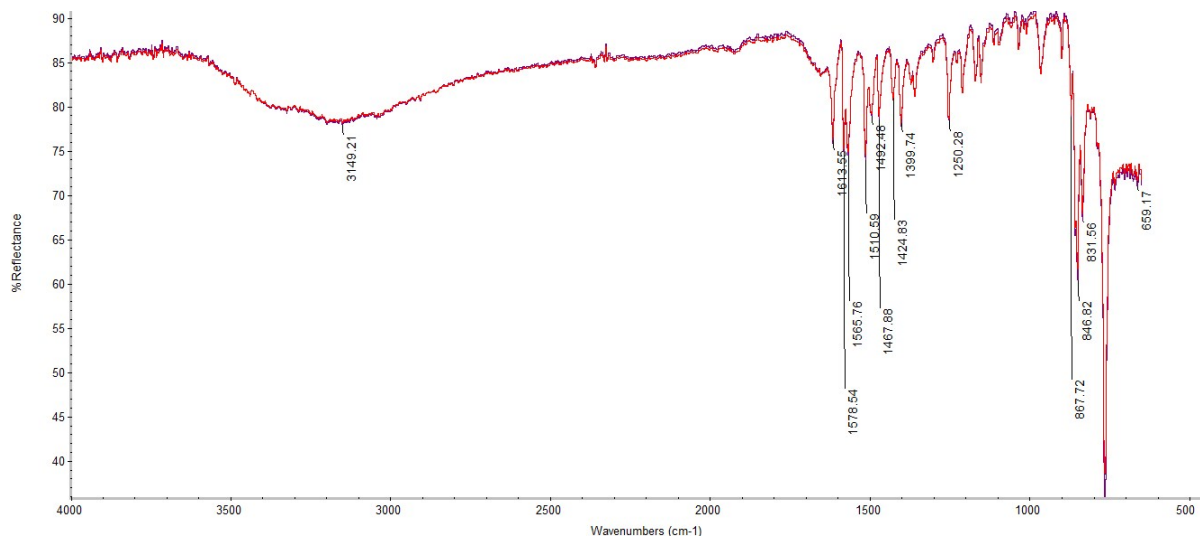

**Fig. S3.** IR Spectra of **L**.

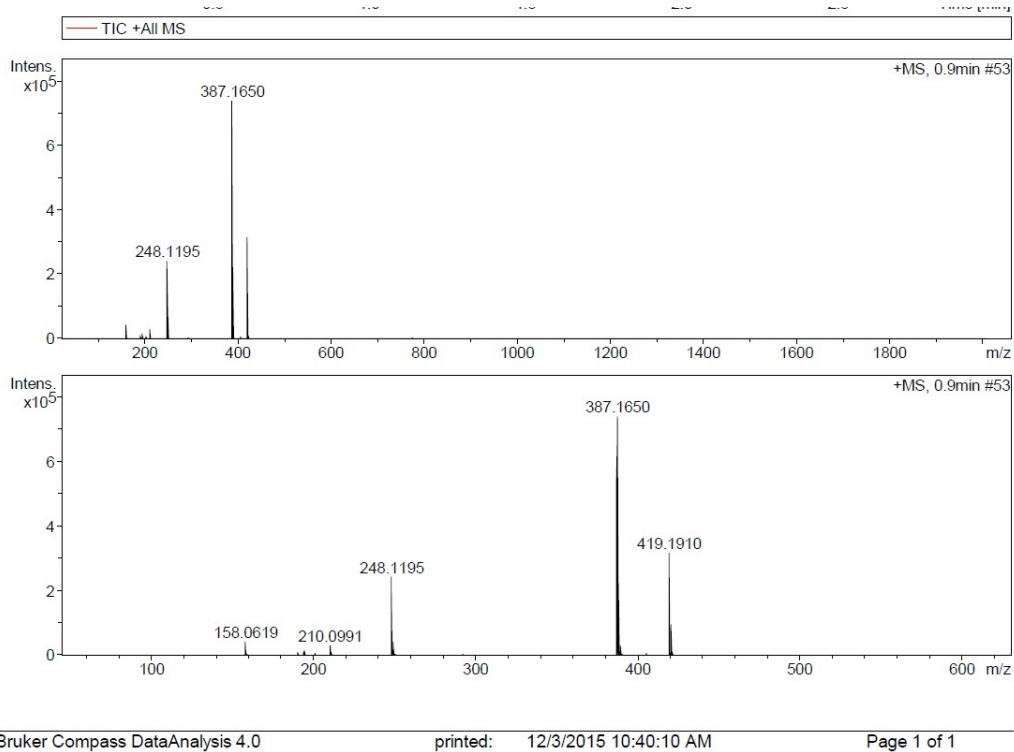

**Fig. S4.** Mass Spectra of L.

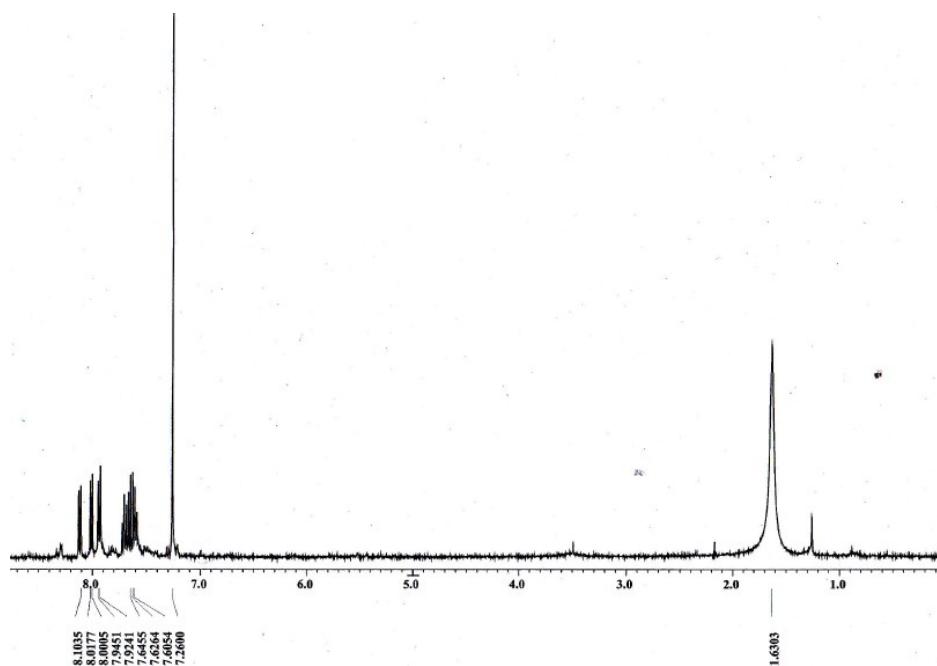

**Fig. S5.** <sup>1</sup>H NMR Spectra of L<sub>1</sub> in CDCl<sub>3</sub>.

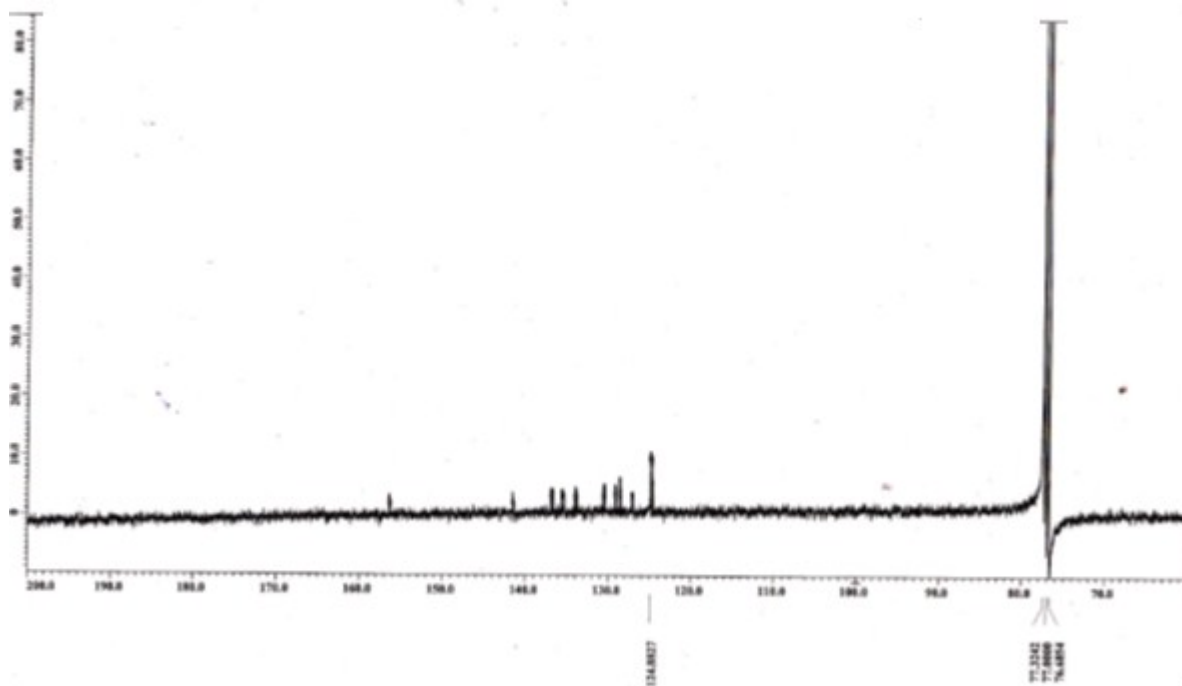

**Fig. S6.**  $^{13}\text{C}$  NMR Spectra of  $\text{L}_1$  in  $\text{CDCl}_3$ .

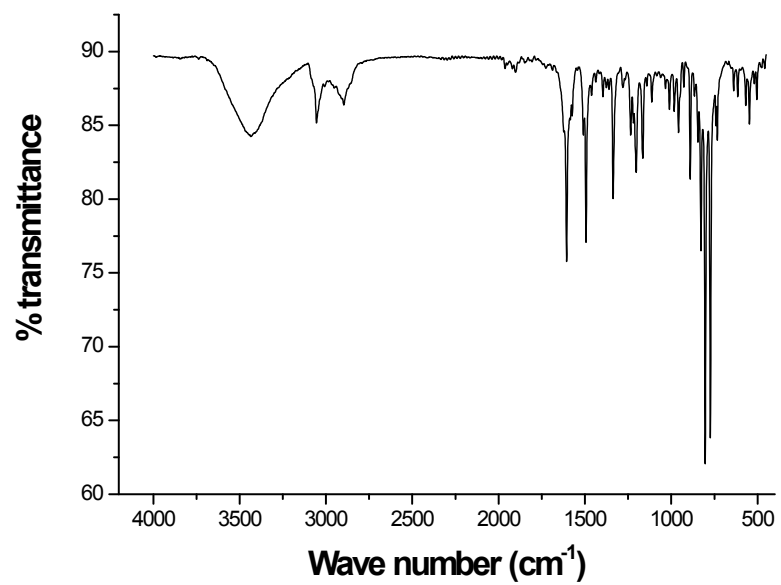

**Fig. S7.** IR Spectra of  $\text{L}_1$ .

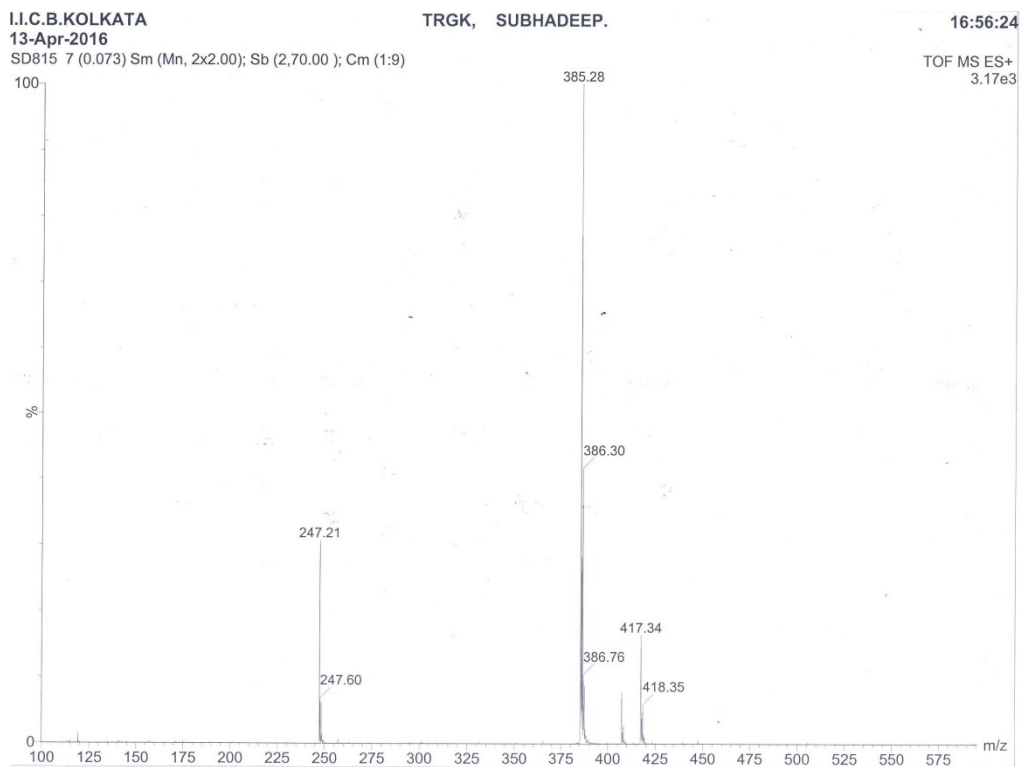

Fig. S8. Mass Spectra of L<sub>1</sub>.

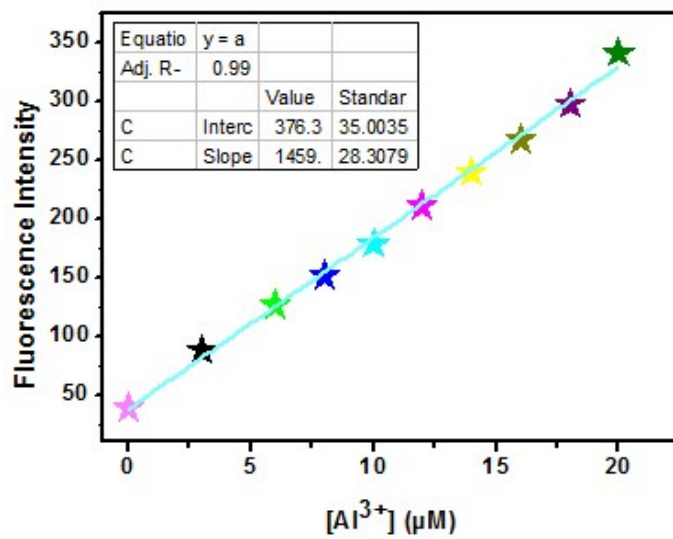

Fig. S9. Change of Fluorescence intensity on increasing amounts of Al<sup>3+</sup> at pH=7.4.

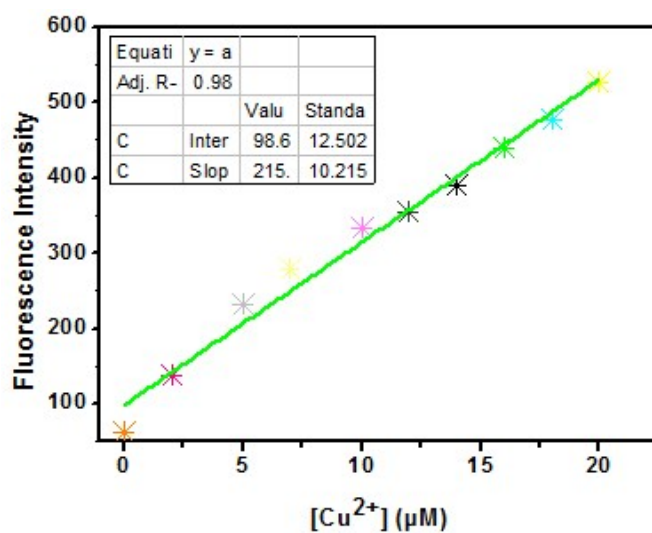

**Fig. S10.** Change of Fluorescence intensity on increasing amounts of  $\text{Cu}^{2+}$  at  $\text{pH}=7.4$ .

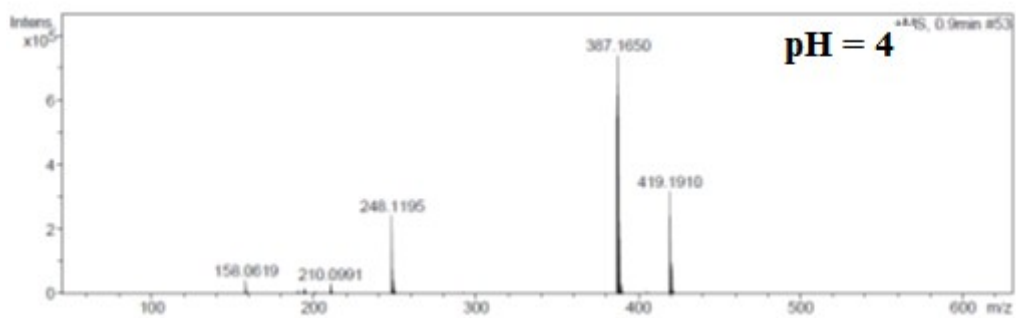

(a)

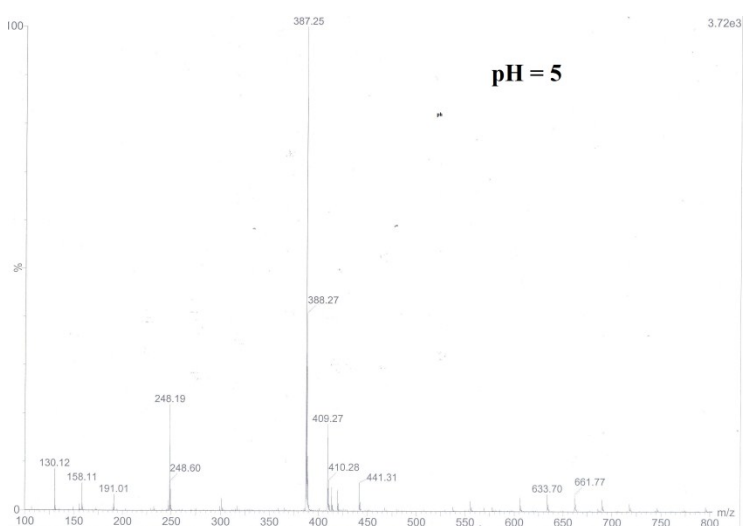

(b)

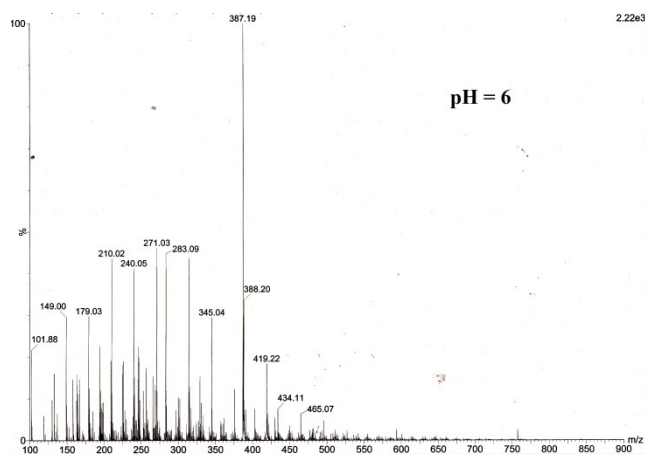

(c)

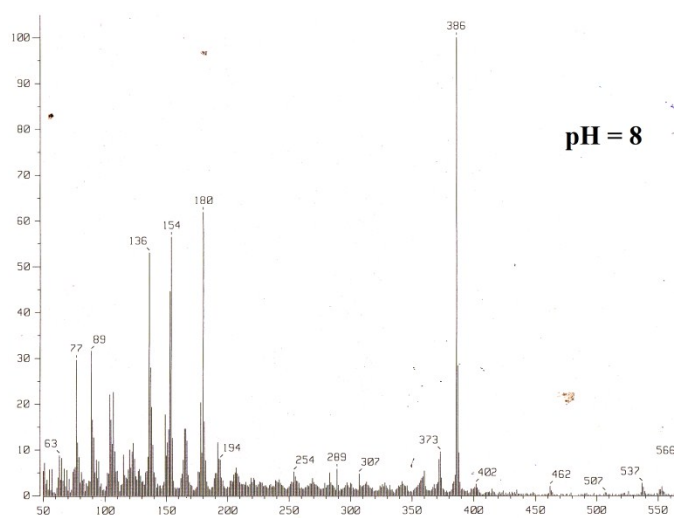

(d)

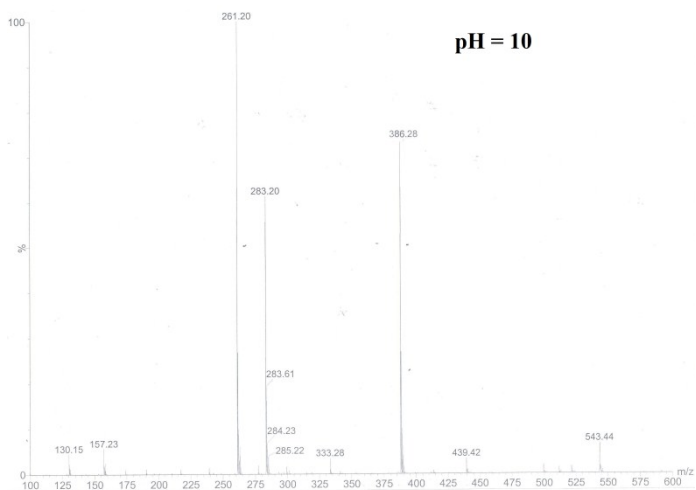

(e)

**Fig. S11.** ESI-MS of **L** at different pH, (a) pH = 4; (b) pH = 5; (c) pH = 6; (d) pH = 8 and (e) pH = 10



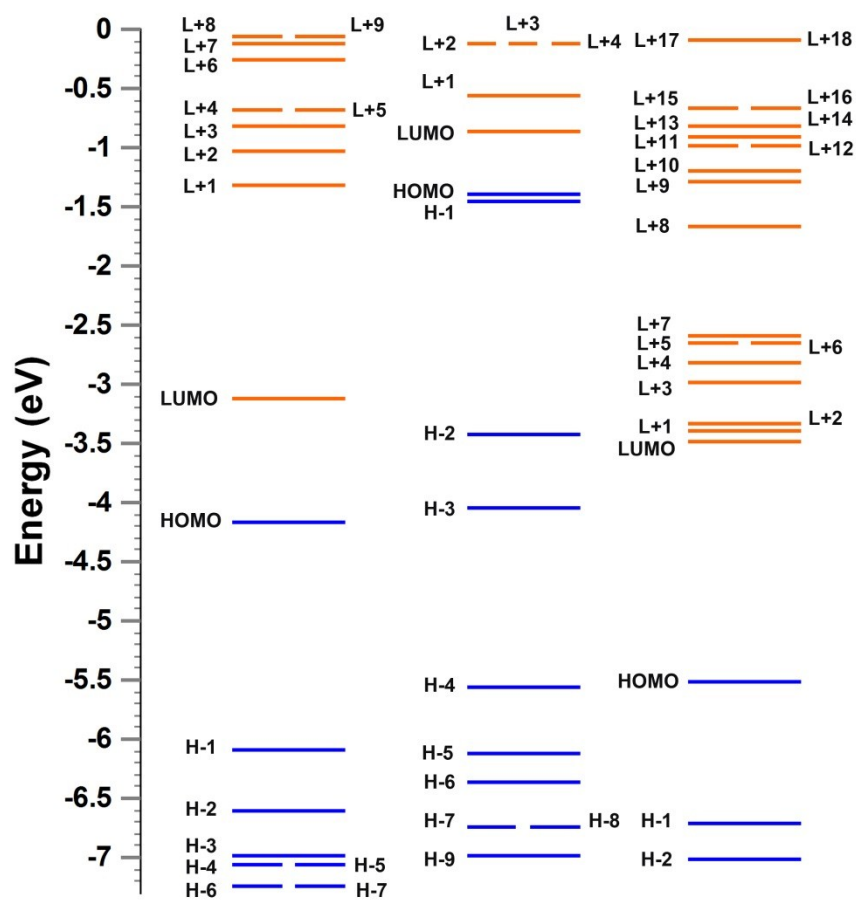

Fig. S12. The MO diagram of L (left), 1(middle) and 2 (right) are showing energy level.

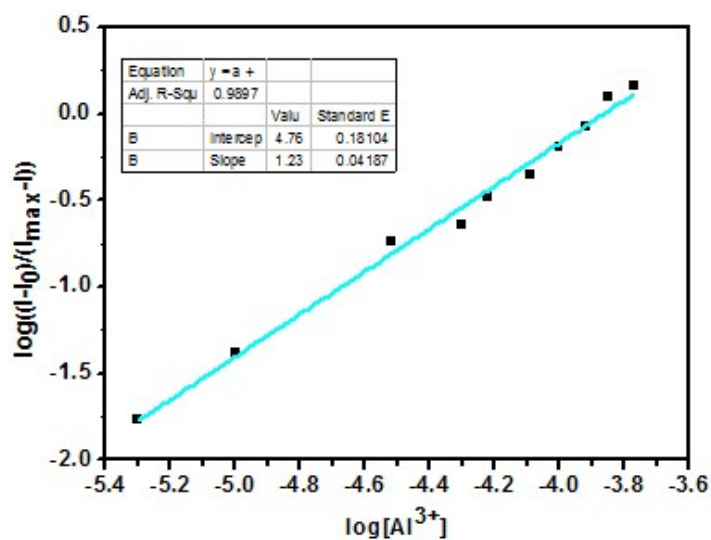

Fig. S13. Hill plot for  $\text{Al}^{3+}$ .

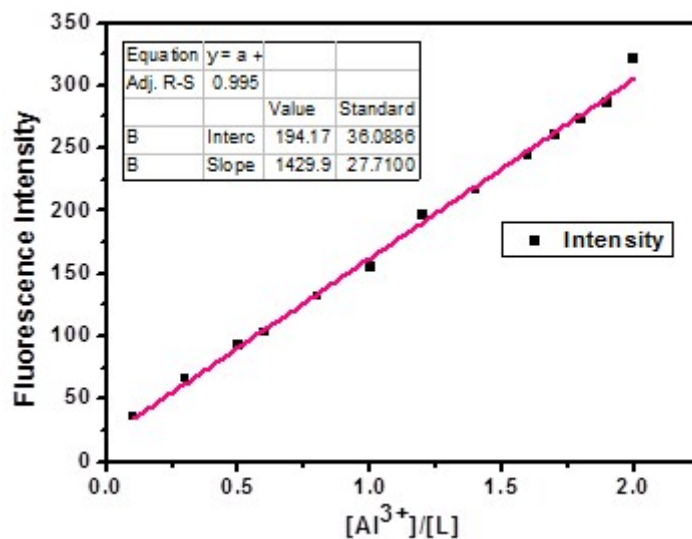

Fig. S14. Detection limit for Al<sup>3+</sup>.

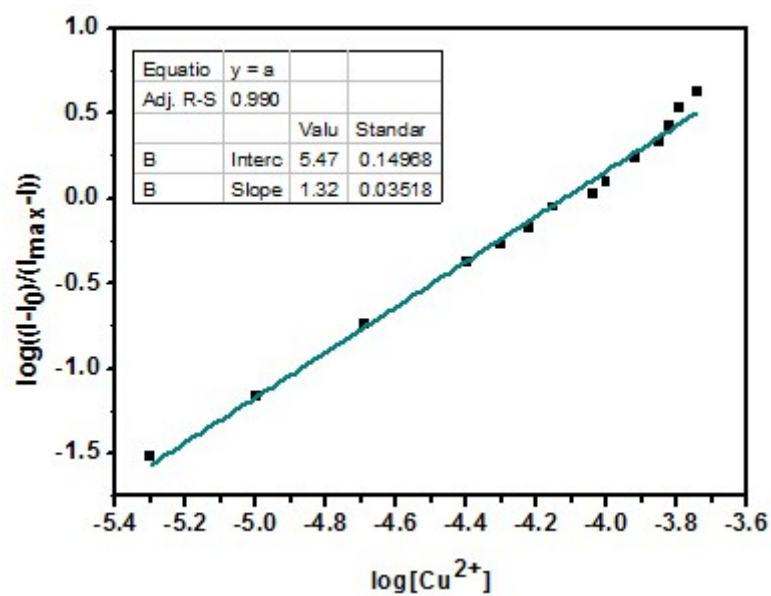

Fig. S15. Hill plot for Cu<sup>2+</sup>.

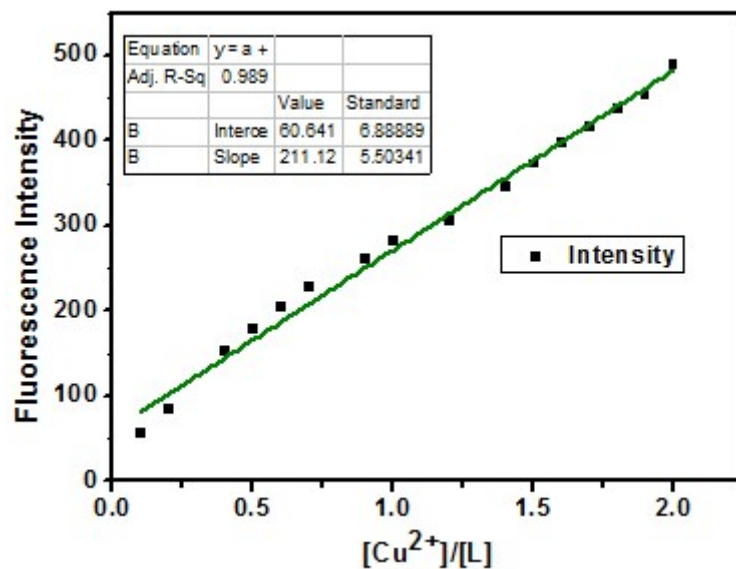

Fig. S16. Detection limit for  $\text{Cu}^{2+}$ .

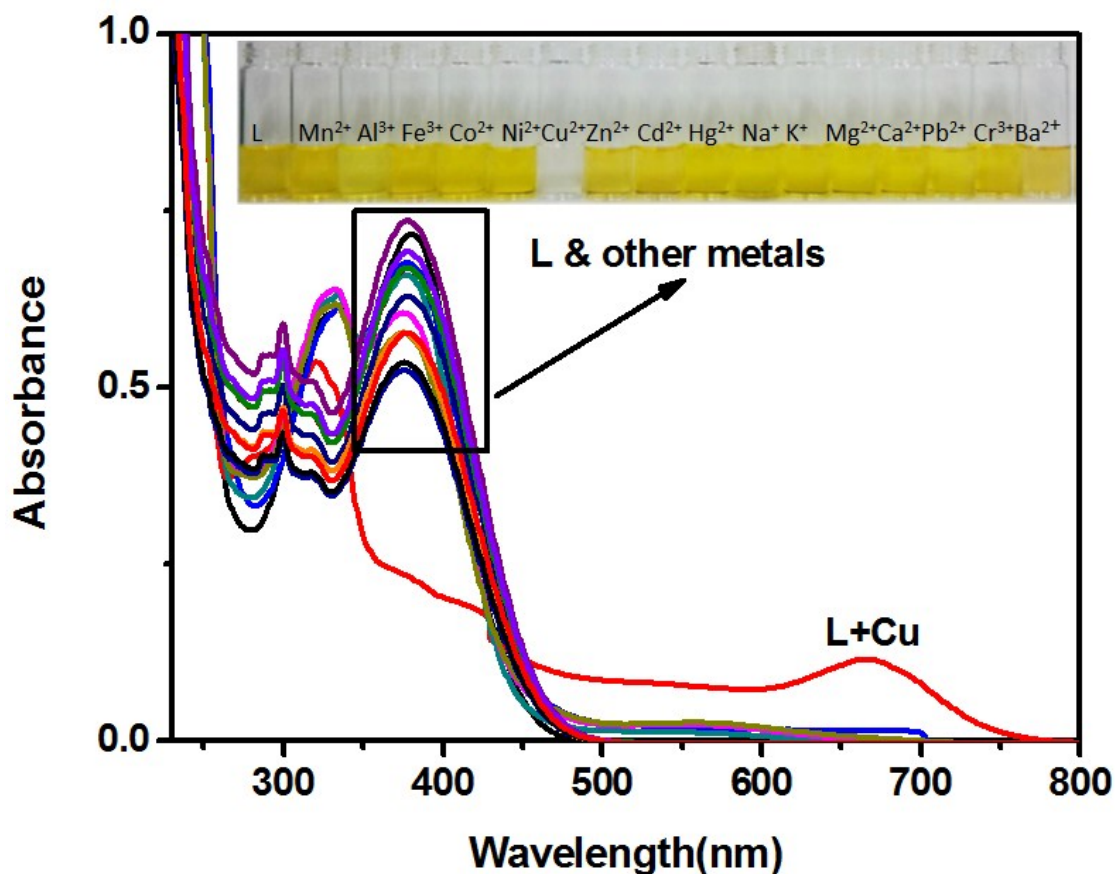

Fig. S17. Absorbance spectra of L (10  $\mu\text{M}$ ) before and after addition of 5 equiv. of various metal ions of  $\text{Mn}^{2+}$ ,  $\text{Fe}^{3+}$ ,  $\text{Co}^{2+}$ ,  $\text{Ni}^{2+}$ ,  $\text{Cu}^{2+}$ ,  $\text{Zn}^{2+}$ ,  $\text{Cd}^{2+}$ ,  $\text{Hg}^{2+}$ ,  $\text{Na}^+$ ,  $\text{K}^+$ ,  $\text{Mg}^{2+}$ ,  $\text{Ca}^{2+}$ ,  $\text{Al}^{3+}$ ,  $\text{Pb}^{2+}$ ,  $\text{Cr}^{3+}$  and  $\text{Ba}^{2+}$  in acetonitrile–water (2 : 1, v/v).

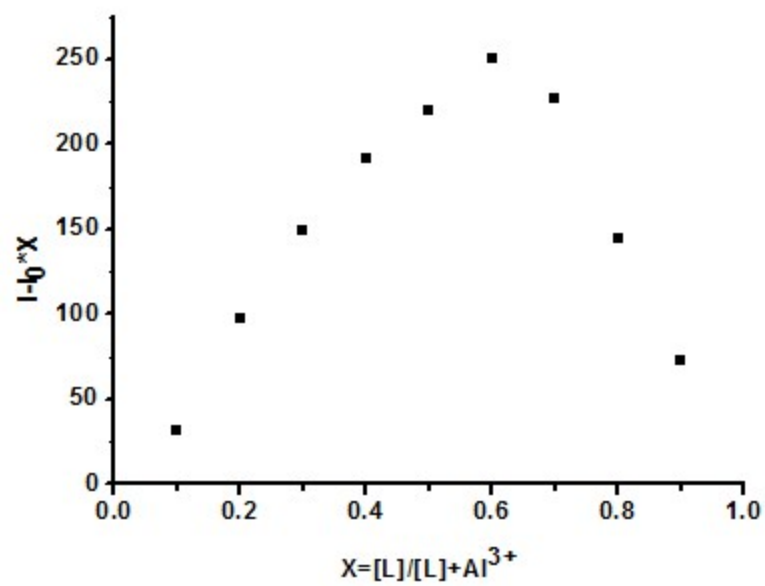

(a)

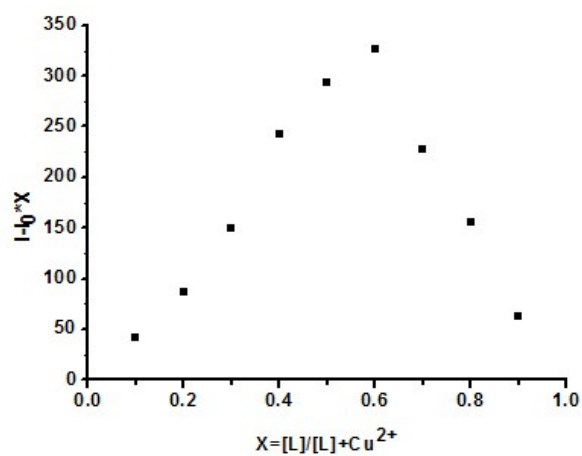

(b)

Fig. S18. Job's plot for (a)  $\text{Al}^{3+}$  and (b)  $\text{Cu}^{2+}$ .

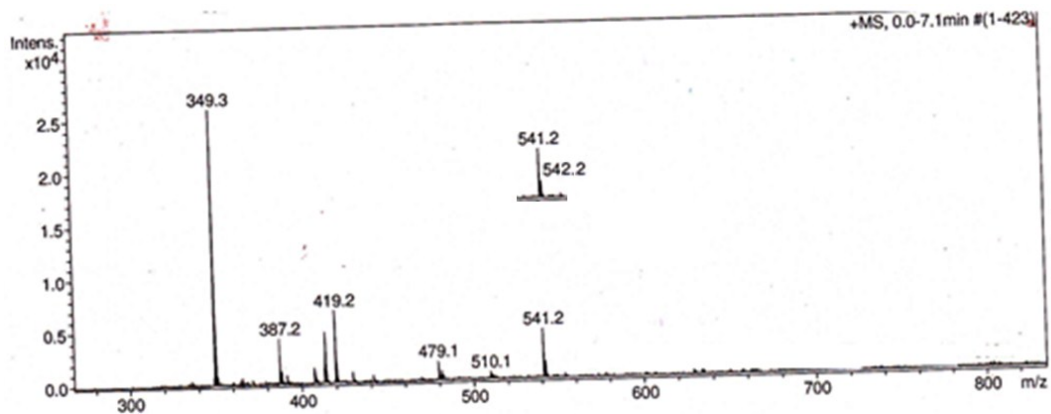

(a)

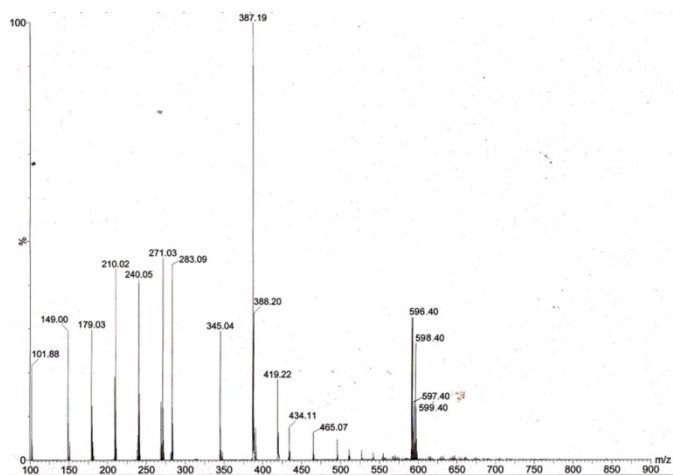

(b)

**Fig. S19.** Mass spectra of (a)  $L-Al^{3+}$  complex, **1** and (b)  $L-Cu^{2+}$  complex, **2**.

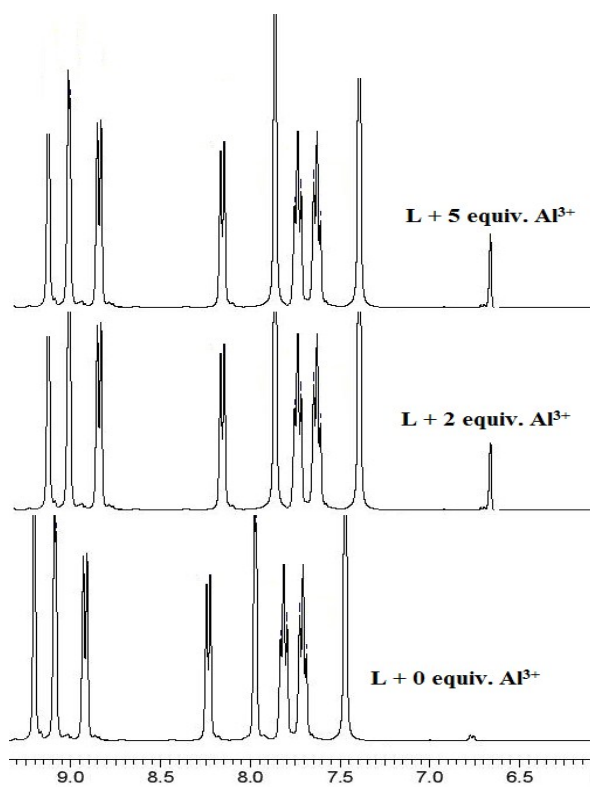

**Fig. S20.**  $^1H$  NMR titration of  $L-Al^{3+}$  complex, **1**

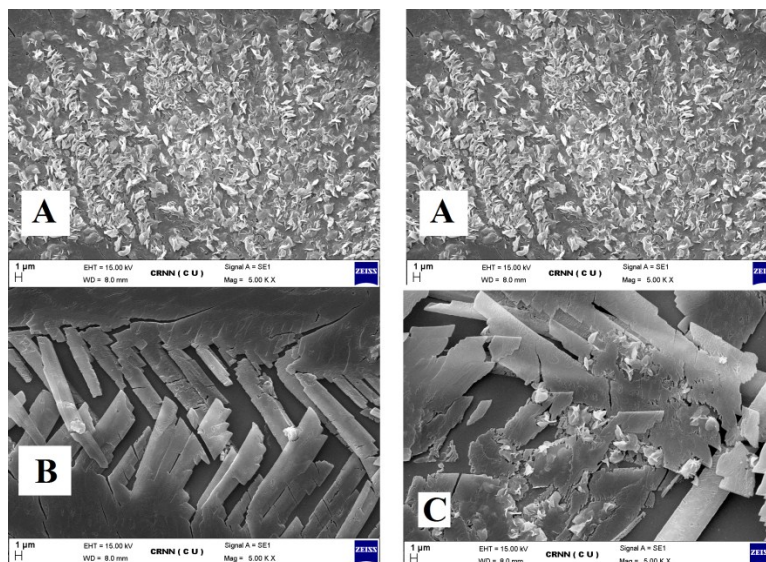

**Fig. S21.** SEM images of (A) L, (B) L+Al<sup>3+</sup> complex, **1** and (C) L+Cu<sup>2+</sup> complex, **2**.

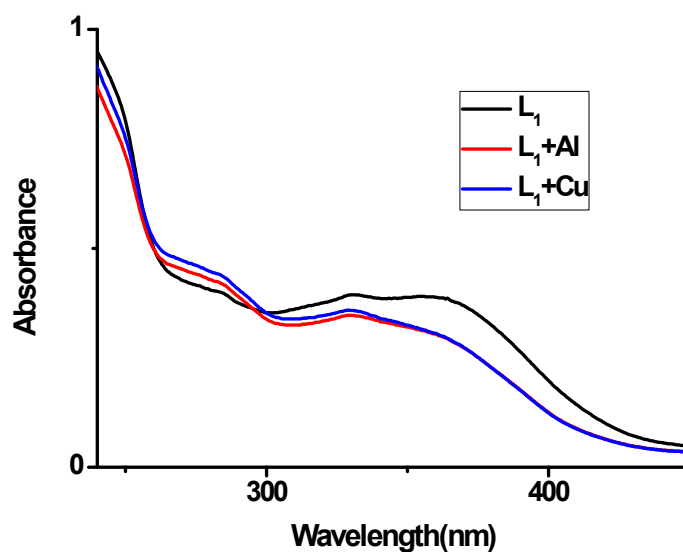

**Fig. S22.** Change of absorbance spectra of L<sub>1</sub> on addition of Al<sup>3+</sup> and Cu<sup>2+</sup>.

**Table S1.** The calculated electronic transition parameters by the TD-DFT method compared with experimental results for L, **1** and **2**.

| Character of Molecular Orbitals    | Most important orbital excitations         | $\lambda$ (nm) | f      | Exp. $\lambda$ (nm) |
|------------------------------------|--------------------------------------------|----------------|--------|---------------------|
| <b>L</b>                           |                                            |                |        |                     |
| H (66% $\pi$ nap, 21% $\pi$ dab)   | H $\rightarrow$ L                          | 489.34         | 0.0300 | 378                 |
| H-1 (46% $\pi$ nap, 42% $\pi$ dab) | H-2 $\rightarrow$ L, H-3 $\rightarrow$ L+1 | 452.34         | 0.0244 |                     |

|                                                            |                                                                     |        |        |        |
|------------------------------------------------------------|---------------------------------------------------------------------|--------|--------|--------|
| H-2 (84% $\pi$ nap, 7% $\pi$ dab)                          | H-3 $\rightarrow$ L, H-2 $\rightarrow$ L+1                          | 432.09 | 0.0134 | 315    |
| H-3 (72% $\pi$ nap, 28% $\pi$ dab)                         | H $\rightarrow$ L+1, H-10 $\rightarrow$ L                           | 384.38 | 0.2649 |        |
| H-4 (100% $\pi$ nap)                                       | H-8 $\rightarrow$ L+1, H-7 $\rightarrow$ L                          | 362.79 | 0.0275 |        |
| H-5 (100 $\pi$ nap)                                        | H-4 $\rightarrow$ L                                                 | 321.85 | 0.1368 |        |
| L (57% $\pi^*$ nap, 33% $\pi^*$ dab)                       | H-5 $\rightarrow$ L                                                 | 315.87 | 0.1688 |        |
| L+1 (80% $\pi^*$ nap, 17% $\pi^*$ dab)                     | H-6 $\rightarrow$ L, H $\rightarrow$ L+4                            | 296.49 | 0.5516 | 243    |
| L+2 (92% $\pi^*$ nap, 6% $\pi^*$ dab)                      | H-5 $\rightarrow$ L+1, H $\rightarrow$ L+2, H-11 $\rightarrow$ L    | 283.87 | 0.3072 |        |
| L+3 (87% $\pi^*$ dab, 13% $\pi^*$ nap)                     | H-10 $\rightarrow$ L, H-6 $\rightarrow$ L+1                         | 275.19 | 0.1403 |        |
| L+4 (89% $\pi^*$ nap, 11% $\pi^*$ dap)                     | H-5 $\rightarrow$ L+2, H-5 $\rightarrow$ L+2                        | 272.52 | 0.1690 |        |
| L+5 (98% $\pi^*$ nap)                                      |                                                                     |        |        |        |
| <b>1</b>                                                   |                                                                     |        |        |        |
| H (48% $\pi$ W, 37% <b>Li</b> , 15% Al)                    | H $\rightarrow$ L, H -1 $\rightarrow$ L+1                           | 498.97 | 0.1391 | 380 sh |
| H-1 (44% $\pi$ W, 43% <b>Li</b> , 13% Al)                  | H-1 $\rightarrow$ L+8, H $\rightarrow$ L+7                          | 457.66 | 0.0021 |        |
| H-2 (98% $\pi$ L)                                          | H $\rightarrow$ L+9, H-1 $\rightarrow$ L+10                         | 408.07 | 0.1271 |        |
| H-3 (98% $\pi$ L)                                          | H-2 $\rightarrow$ L, H-1 $\rightarrow$ L+10                         | 355.16 | 0.8223 | 322    |
| H-4 (99% $\pi$ L)                                          | H-2 $\rightarrow$ L, H-1 $\rightarrow$ L+10, H $\rightarrow$ L+11   | 344.94 | 0.1500 |        |
| H-5 (98% $\pi$ L)                                          | H-1 $\rightarrow$ L+10, H $\rightarrow$ L+11                        | 290.20 | 0.0065 | 249    |
| L ((22% $\pi^*$ W, 70% $\pi^*$ L, 8% $\pi^*$ Al)           | H-2 $\rightarrow$ L+3, H-3 $\rightarrow$ L+4, H-2 $\rightarrow$ L+2 | 248.76 | 0.1388 |        |
| L+1 (81% $\pi^*$ L, 14% $\pi^*$ W, 5% $\pi^*$ Al)          | H-1 $\rightarrow$ L+13, H $\rightarrow$ L+12                        | 241.99 | 0.3225 |        |
| L+2 (95% $\pi^*$ L)                                        |                                                                     |        |        |        |
| L+3 (88% $\pi^*$ L, 6% $\pi^*$ W, 5% $\pi^*$ Al)           | H-2 $\rightarrow$ L+2, H-2 $\rightarrow$ L+8                        | 234.85 | 0.0303 |        |
| L+4 (94% $\pi^*$ L)                                        |                                                                     |        |        |        |
| L+5 (59% $\pi^*$ L, 29% $\pi^*$ W, 12% $\pi^*$ Al)         |                                                                     |        |        |        |
| <b>2</b>                                                   |                                                                     |        |        |        |
| H (55% d orbitals of Cu, 40% $\pi$ L)                      | H $\rightarrow$ L                                                   | 653.04 | 0.0456 | 660    |
| H-1 (91% $\pi$ L, 8% $\pi$ NO <sub>3</sub> <sup>-</sup> )  | H-10 $\rightarrow$ L+2, H-9 $\rightarrow$ L                         | 494.54 | 0.0606 | 367sh  |
| H-2 (85% $\pi$ L, 14% $\pi$ NO <sub>3</sub> <sup>-</sup> ) | H-1 $\rightarrow$ L, H-1 $\rightarrow$ L+1                          | 357.14 | 0.3054 |        |
| H-3 (75% $\pi$ L, 22% $\pi$ NO <sub>3</sub> <sup>-</sup> ) | H-1 $\rightarrow$ L+1, H $\rightarrow$ L+3                          | 345.42 | 0.0029 |        |
| H-4 (88% $\pi$ L, 10% $\pi$ ACN)                           | H $\rightarrow$ L+3, H-10 $\rightarrow$ L                           | 342.08 | 0.0042 | 323    |
| H-5(98% $\pi$ L)                                           | H-1 $\rightarrow$ L+2, H-4 $\rightarrow$ L, H-5 $\rightarrow$ L     | 330.99 | 0.0057 |        |
| H-6 (98% $\pi$ L)                                          | H-9 $\rightarrow$ L, H-6 $\rightarrow$ L+2, H-6 $\rightarrow$ L+2   | 319.92 | 0.0302 |        |
| L (62% d orbitals Cu, 27% $\pi^*$ L)                       | H-7 $\rightarrow$ L+2, H-14 $\rightarrow$ L                         | 314.89 | 0.0508 |        |

|                                                                |                           |        |        |        |
|----------------------------------------------------------------|---------------------------|--------|--------|--------|
| L+1 (43% $\pi^*$ L, 56% $\pi^*$ NO <sub>3</sub> <sup>-</sup> ) | H-4 → L, H-4 → L+1        | 312.72 | 0.0355 | 240 sh |
| L+2 (67% $\pi^*$ L, 31% $\pi^*$ NO <sub>3</sub> <sup>-</sup> ) | H-5 → L+1, H-8 → L+1,     | 304.68 | 0.1027 |        |
| L+3 (66% $\pi^*$ L, 23% $\pi^*$ ACN)                           | H-6 → L, H-5 → L, H-7 → L | 302.43 | 0.0383 |        |
| L+4 (52% $\pi^*$ ACN, 37% $\pi^*$ L)                           | H-11 → L+2, H-7 → L       | 287.25 | 0.0761 |        |
| L+5 (95% L)                                                    | H-8 → L, H-7 → L+1        | 278.91 | 0.1519 |        |
| L+6 (95% L)                                                    |                           |        |        |        |

H : HOMO, L : LUMO, Nap: naphthalene moiety of Ligand; dab: diaminobenzaldehyde moiety of ligand; L: ligand; ACN: acetonitrile, W: water.
